# Supplementary material
Source: Royal Society of Chemistry journal article supplement (doi:10.1039/d6py00347h)
Supplement: d6py00347h1.pdf [file d6py00347h1.pdf]

*Supporting Information*

**Post-polymerisation functionalisation of conjugated polymers: oligoether side-chain length governs exciton lifetime and dissociation for enhanced photocatalytic hydrogen evolution**

Yidong Deng,<sup>a, b</sup> Guoqing Tian,<sup>a, b</sup> Rong Fan,<sup>a, b</sup> Ningning Wang,<sup>a, b</sup> Mingming Liu,<sup>\*a</sup>  
Po Sun,<sup>\*a, c</sup> and Hua Sun,<sup>\*b</sup>

---

<sup>a</sup> School of Chemistry and Chemical Engineering, Anhui University of Technology, Ma'anshan, Anhui 243002, P. R. China. Email: [mmliu@ahut.edu.cn](mailto:mmliu@ahut.edu.cn), [sunpoo@ahut.edu.cn](mailto:sunpoo@ahut.edu.cn)

<sup>b</sup> Key Laboratory of Functional Materials for Production, Storage and Utilization of Industrial By-product Hydrogen in Jiangsu's Universities, School of Material and Chemical Engineering, Xuzhou University of Technology, Xuzhou 221018, China. Email: [iamsunhua@xzit.edu.cn](mailto:iamsunhua@xzit.edu.cn)

<sup>c</sup> Hainan Engineering Research Center of Tropical Ocean Advanced Opto-electrical Functional Materials, Haikou, Hainan 571158, China.

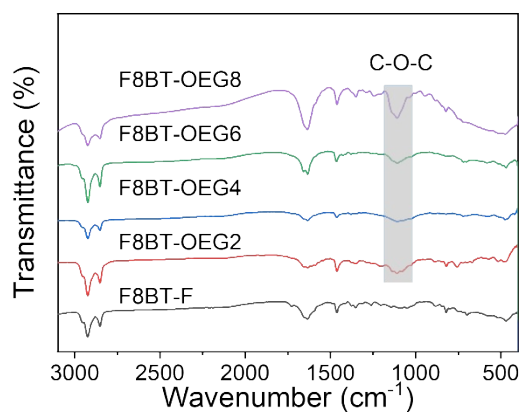

**Figure S1.** FT-IR spectra of the polymers.

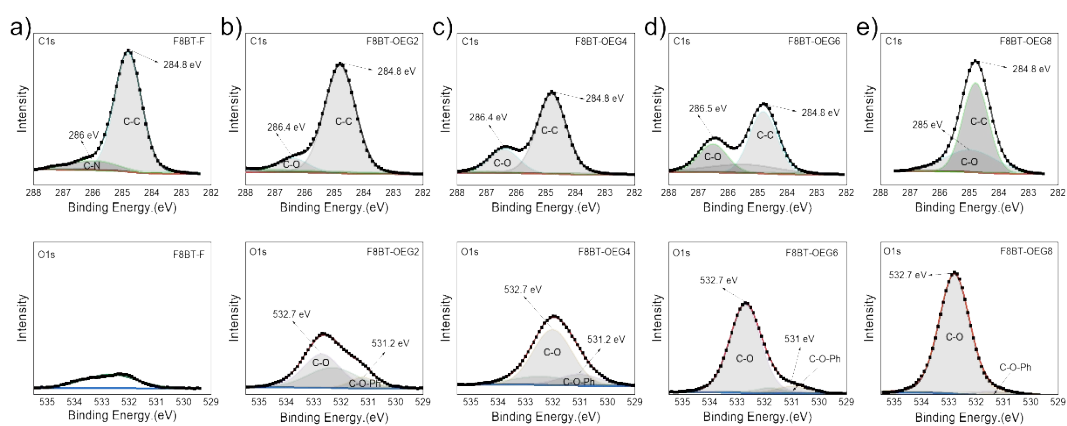

**Figure S2.** C 1s and O 1s XPS spectra of (a) F8BT-F, (b) F8BT-OEG2, (c) F8BT-OEG4, (d) F8BT-OEG6 and (e) F8BT-OEG8.

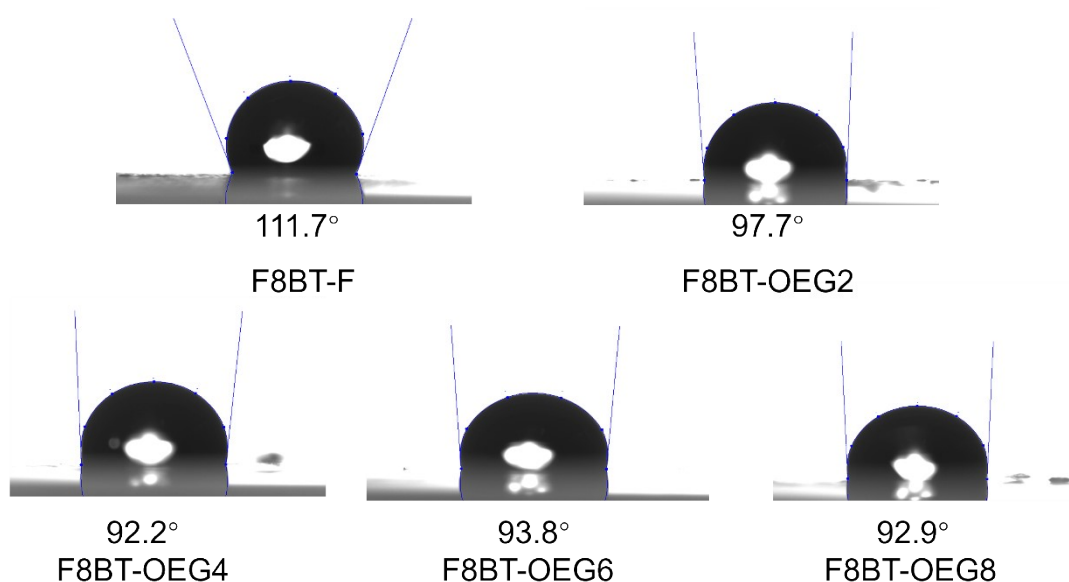

**Figure S3.** Contact angles of the polymer films with water.

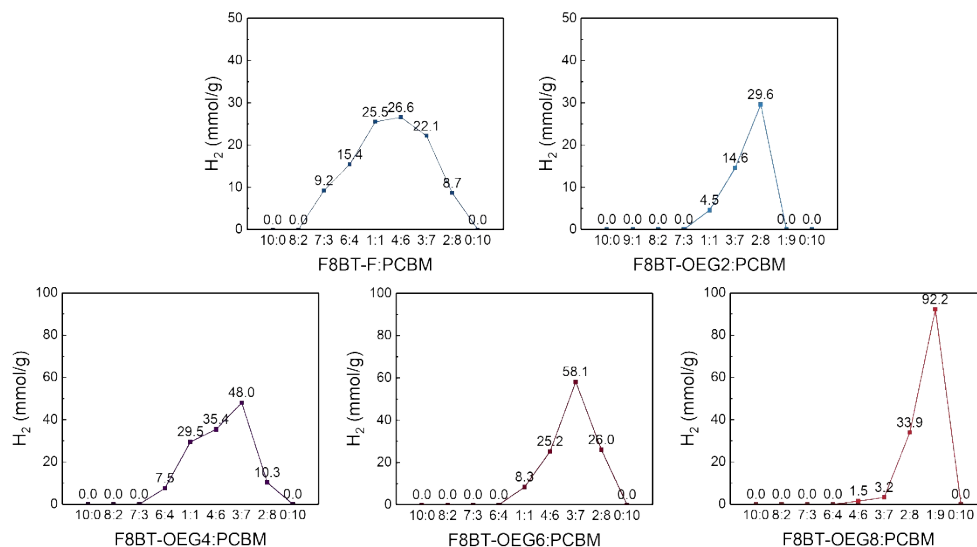

**Figure S4.** Screening of the optimal D:A (*w/w*) ratios for F8BT-F:PCBM and F8BT-OEGN:PCBM photocatalysts.

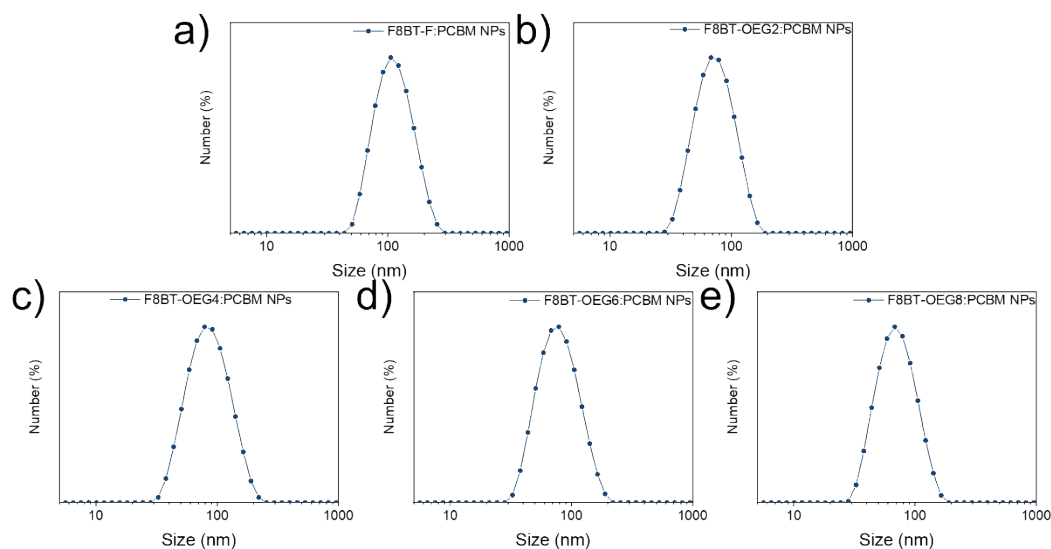

**Figure S5.** DLS size distribution by intensities of the as-prepared (a) F8BT-F:PCBM, (b) F8BT-OEG2:PCBM, (c) F8BT-OEG4:PCBM, (d) F8BT-OEG6:PCBM, and (e) F8BT-OEG8:PCBM nanoparticles.

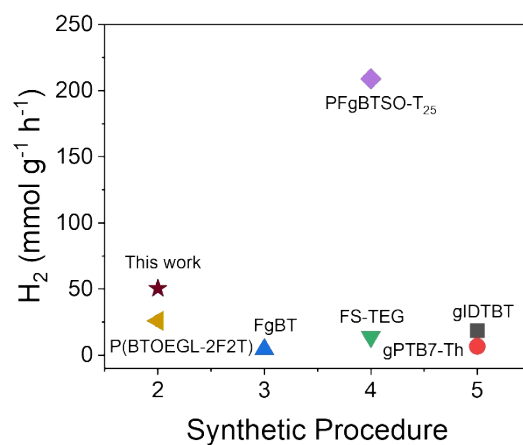

**Figure S6.** Comparison of HER rates and synthetic steps for representative OEG-functionalized polymer photocatalysts.<sup>1-4</sup>

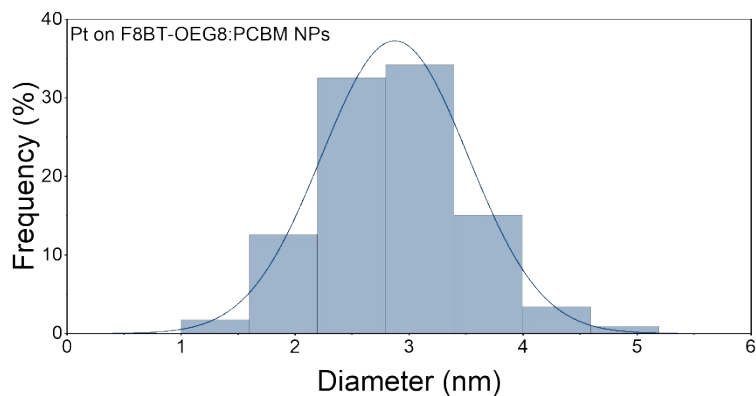

**Figure S7.** Particle size distribution histogram of Pt nanoparticles photodeposited on F8BT-OEG8:PCBM.

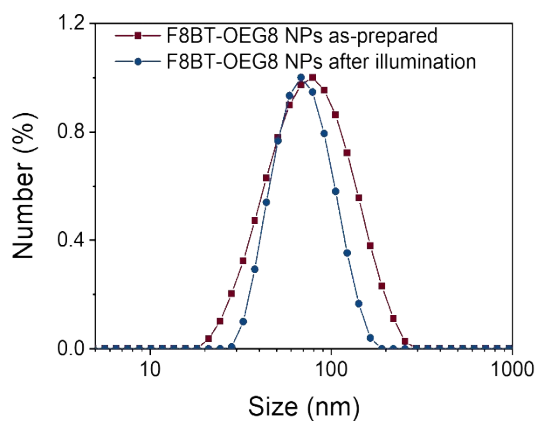

**Figure S8.** DLS particle size distributions of F8BT-OEG8:PCBM nanoparticles before and after 8 h of photocatalytic H<sub>2</sub> evolution.

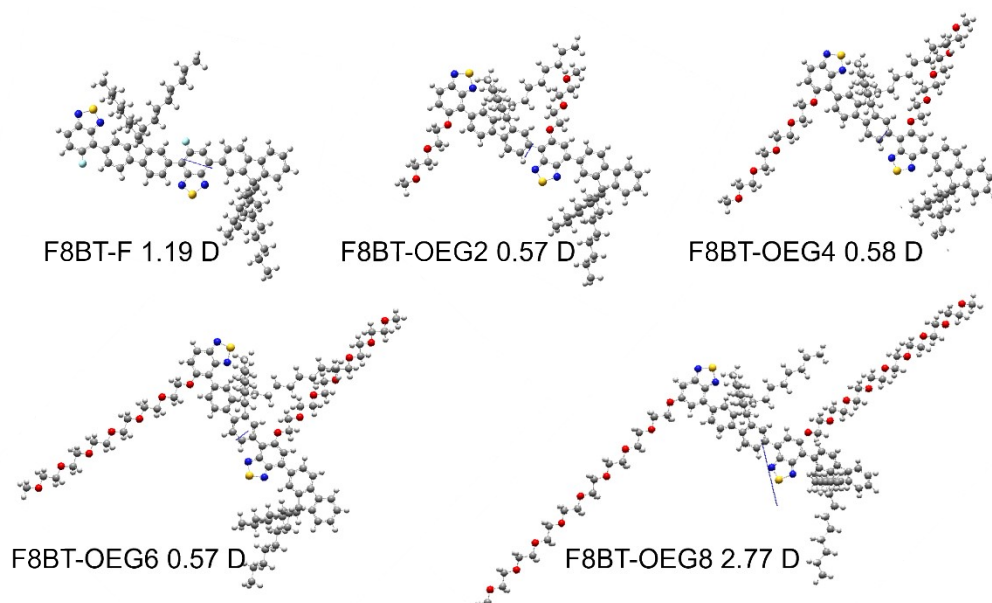

**Figure S9.** Calculated optimal molecular geometries and dipole moments.

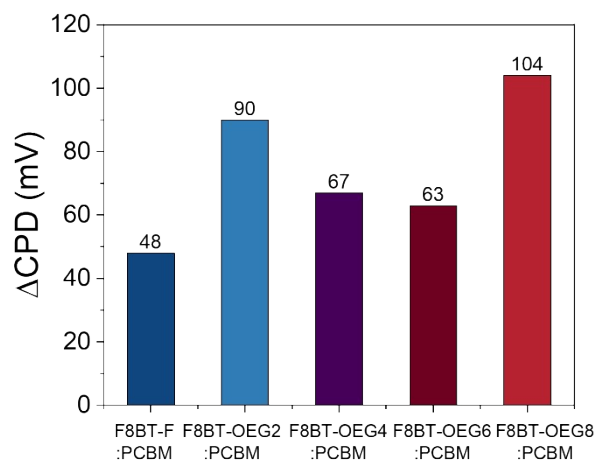

**Figure S10.** Maximum contact potential difference (CPD) values of F8BT-F:PCBM and F8BT-OEGN (N = 2, 4, 6, 8):PCBM films extracted from KPFM images.

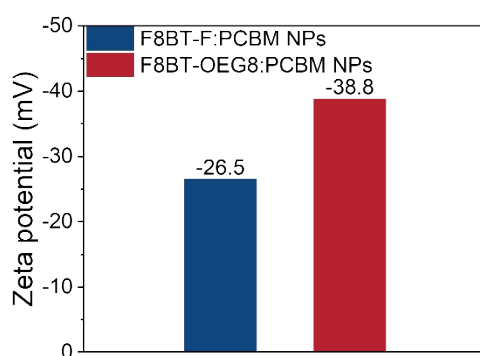

**Figure S11.** The zeta potentials of the as-prepared F8BT-F:PCBM and F8BT-OEG8:PCBM nanoparticles.

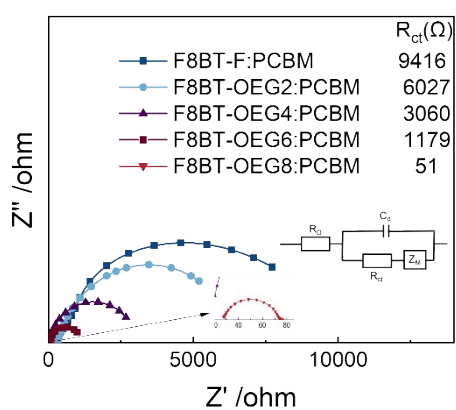

**Figure S12.** Electrochemical impedance spectra of the photocatalysts.

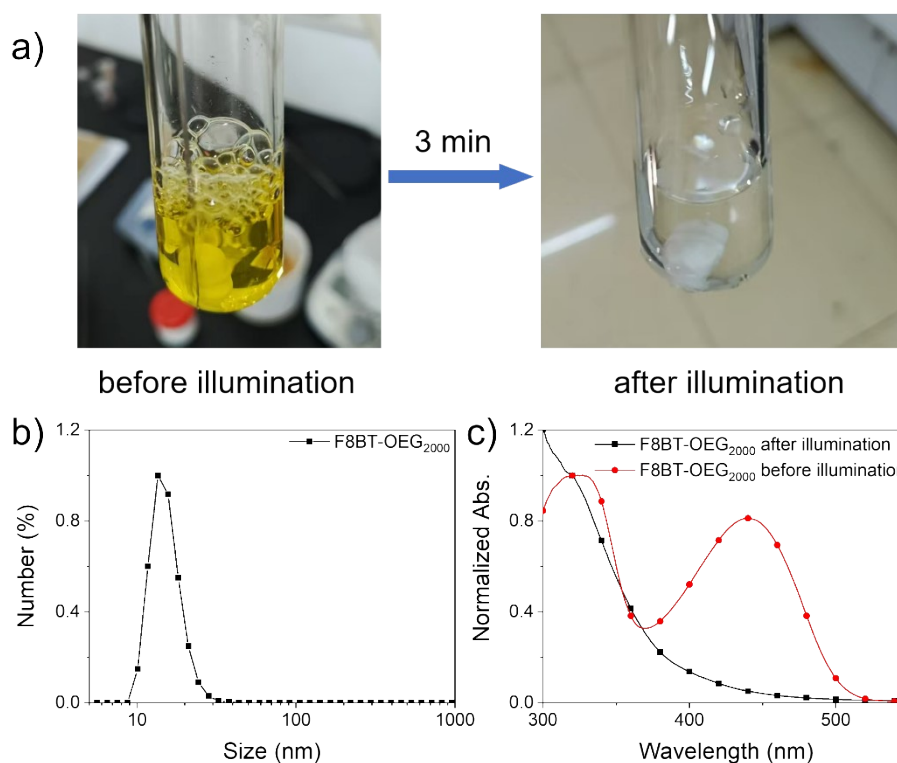

**Figure S13.** Electrochemical impedance spectra of the photocatalysts.

**Table S1.** Fitting parameters for the time-resolved PL decay curves of F8BT-OEGN in chloroform solutions.

| Sample    | $\tau_1$ (ns) | $f_1$ (%) | $\tau_2$ (ns) | $f_2$ (%) | $\chi^2$ | $\tau$ (ns)<br>average lifetime |
|-----------|---------------|-----------|---------------|-----------|----------|---------------------------------|
| F8BT-F    | 2.83          | 96.44     | 14.96         | 3.56      | 1.147    | 4.81                            |
| F8BT-OEG2 | 4.05          | 96.02     | 16.14         | 3.98      | 1.087    | 5.76                            |
| F8BT-OEG4 | 4.06          | 96.06     | 16.30         | 3.94      | 1.212    | 5.80                            |
| F8BT-OEG6 | 3.89          | 95.09     | 13.77         | 4.91      | 1.038    | 5.26                            |
| F8BT-OEG8 | 4.02          | 95.38     | 15.05         | 4.62      | 1.140    | 5.65                            |

#### References

1. A. Holmes, J. Pan, L. Wang, L. Franco, R. R. Bicudo, B. Albinsson, C. M. Araujo, W. Zhu, D. Wang, T.-Q. Nguyen, J. Zhu and E. Wang, *Advanced Materials*, 2025, 37, 2507702.
2. J. Kosco, S. Gonzalez-Carrero, C. T. Howells, W. Zhang, M. Moser, R. Sheelamantula, L. Zhao, B. Willner, T. C. Hidalgo, H. Faber, B. Purushothaman, M. Sachs, H. Cha, R. Sougrat,

- T. D. Anthopoulos, S. Inal, J. R. Durrant and I. McCulloch, *Advanced Materials*, 2022, 34, 2105007.
3. D. J. Woods, S. A. J. Hillman, D. Pearce, L. Wilbraham, L. Q. Flagg, W. Duffy, I. McCulloch, J. R. Durrant, A. A. Y. Guilbert, M. A. Zwiijnenburg, R. S. Sprick, J. Nelson and A. I. Cooper, *Energy & Environmental Science*, 2020, 13, 1843-1855.
  4. S. An, Z. Wu, H. Jeong, J. Lee, S. Y. Jeong, W. Lee, S. Kim, J. W. Han, J. Lim, H. Cha, H. Y. Woo and D. S. Chung, *Small*, 2023, 19, 2204905.
